# Supplementary material for: The whole set of the constitutive promoters recognized by four minor sigma subunits of Escherichia coli RNA polymerase
Source: PubMed Central journal article supplement (PMC5493296; doi:10.1371/journal.pone.0179181), 2017-06-30
Supplement: pone.0179181.s002.pdf [file pone.0179181.s002.pdf]

**S2 Table**  
**RpoH promoter (RegulonDB)**

**[A] Promoters not identified as the constitutive promoters**

| Promoter       | SELEX | Direction | Genome position | Evidence             |
|----------------|-------|-----------|-----------------|----------------------|
| <i>yjiTp</i>   | -     | forward   | 0               | IDAIS, IEPIW         |
| <i>yafUp</i>   | -     | reverse   | 0               | HIPPIW, IDAIS, TIMIS |
| <i>yehRp</i>   | -     | forward   | 0               | IDAIS, IEPIW         |
| <i>ydeOp</i>   | -     | reverse   | 0               | IDAIS, IEPIW         |
| <i>yiaAp</i>   | -     | reverse   | 0               | IDAIS, IEPIW         |
| <i>yccEp</i>   | -     | forward   | 0               | IDAIS, IEPIW         |
| <i>yrdAp</i>   | -     | forward   | 0               | IDAIS, IEPIW         |
| <i>yjhlp</i>   | -     | reverse   | 0               | IDAIS, IEPIW         |
| <i>yrfGp</i>   | -     | forward   | 0               | IDAIS, IEPIW         |
| <i>casDp</i>   | -     | reverse   | 0               | IDAIS, IEPIW         |
| <i>osmFp2</i>  | -     | reverse   | 0               | IDAIS, IEPIW         |
| <i>hfqp1</i>   | -     | forward   | 0               | IDAIS, IEPIW         |
| <i>htgAp1</i>  | -     | forward   | 10644           | HIPPIW, TIMIS        |
| <i>yaaWp3</i>  | -     | reverse   | 11542           | ICWHOIW, TIMIS       |
| <i>ileSp3</i>  | -     | forward   | 22229           | AIPPIW, TIMIS        |
| <i>caiEp5</i>  | -     | reverse   | 35440           | ICWHOIW              |
| <i>kefFp2</i>  | -     | forward   | 47080           | ICWHOIW              |
| <i>hepAp2</i>  | -     | reverse   | 63588           | HIPPIW, IDAIS, TIMIS |
| <i>fruRp8</i>  | -     | forward   | 87947           | ICWHOIW              |
| <i>yadDp5</i>  | -     | forward   | 146957          | ICWHOIW              |
| <i>yadDp4</i>  | -     | forward   | 146959          | ICWHOIW              |
| <i>rrsHp1</i>  | -     | forward   | 223485          | HIPPIW, ICWHOIW      |
| <i>yafDp</i>   | -     | forward   | 231064          | AIPPIW, IDAIS, TIMIS |
| <i>yafCp6</i>  | -     | reverse   | 231083          | ICWHOIW              |
| <i>ivyp5</i>   | -     | forward   | 240329          | ICWHOIW              |
| <i>proBp11</i> | -     | forward   | 259527          | ICWHOIW              |
| <i>mmuPp6</i>  | -     | forward   | 274430          | ICWHOIW              |
| <i>yagGp8</i>  | -     | forward   | 284577          | ICWHOIW              |
| <i>ykgJp3</i>  | -     | reverse   | 303486          | ICWHOIW              |
| <i>ykgEp10</i> | -     | forward   | 320761          | ICWHOIW              |
| <i>betAp5</i>  | -     | reverse   | 326485          | ICWHOIW              |
| <i>yahNp5</i>  | -     | reverse   | 345659          | ICWHOIW              |
| <i>yahNp6</i>  | -     | reverse   | 345660          | ICWHOIW              |
| <i>mhpTp</i>   | -     | forward   | 374610          | AIPPIW               |
| <i>yaiOp5</i>  | -     | reverse   | 380197          | ICWHOIW              |

|                |   |         |        |                      |
|----------------|---|---------|--------|----------------------|
| <i>yaiSp9</i>  | - | reverse | 383932 | ICWHOIW              |
| <i>insFp5</i>  | - | reverse | 391843 | ICWHOIW              |
| <i>yajDp6</i>  | - | forward | 429693 | ICWHOIW              |
| <i>ribEp</i>   | - | forward | 433728 | AIPPIW, TIMIS        |
| <i>yajLp2</i>  | - | reverse | 442972 | ICWHOIW              |
| <i>ampGp4</i>  | - | reverse | 452910 | ICWHOIW              |
| <i>clpPp3</i>  | - | forward | 455829 | IDAIS, IEPIW, TIMIS  |
| <i>lonp</i>    | - | forward | 458039 | HIPPIW, IDAIS, IEPIW |
| <i>ppiDp1</i>  | - | forward | 461062 | HIPPIW, TIMIS        |
| <i>htpGp1</i>  | - | forward | 494299 | HIPPIW, IDAIS, TIMIS |
| <i>htpGp2</i>  | - | forward | 494308 | HIPPIW, IDAIS, TIMIS |
| <i>fsrp8</i>   | - | reverse | 503991 | ICWHOIW              |
| <i>fsrp9</i>   | - | reverse | 504079 | ICWHOIW              |
| <i>ybbNp1</i>  | - | reverse | 517714 | AIPPIW, IDAIS, IEPIW |
| <i>ybbNp2</i>  | - | reverse | 517792 | AIPPIW               |
| <i>ybcJp5</i>  | - | reverse | 556229 | ICWHOIW              |
| <i>ybcNp6</i>  | - | forward | 571537 | ICWHOIW              |
| <i>quuDp3</i>  | - | forward | 572997 | ICWHOIW              |
| <i>ybdJp3</i>  | - | reverse | 605634 | ICWHOIW              |
| <i>entDp1</i>  | - | reverse | 609477 | ICWHOIW              |
| <i>ybeFp6</i>  | - | reverse | 660733 | ICWHOIW              |
| <i>rlpAp5</i>  | - | reverse | 664445 | ICWHOIW              |
| <i>ybeQp10</i> | - | reverse | 675847 | ICWHOIW              |
| <i>ybeUp5</i>  | - | forward | 678688 | ICWHOIW              |
| <i>hscCp7</i>  | - | reverse | 682817 | ICWHOIW              |
| <i>ybeZp</i>   | - | reverse | 692692 | AIPPIW, IDAIS, TIMIS |
| <i>glnSp2</i>  | - | forward | 705222 | IDAIS                |
| <i>ybfEp</i>   | - | reverse | 711162 | AIPPIW               |
| <i>rhsCp3</i>  | - | forward | 728602 | ICWHOIW              |
| <i>mngAp</i>   | - | forward | 765034 | HIPPIW, ICIW         |
| <i>ybgEp4</i>  | - | forward | 773373 | ICWHOIW              |
| <i>ybgCp6</i>  | - | forward | 773867 | ICWHOIW              |
| <i>tolBp3</i>  | - | forward | 776783 | ICWHOIW              |
| <i>pglp2</i>   | - | forward | 797762 | ICWHOIW              |
| <i>ybiAp6</i>  | - | reverse | 832183 | ICWHOIW              |
| <i>ybiPp5</i>  | - | reverse | 851849 | ICWHOIW              |
| <i>fsaAp6</i>  | - | forward | 862753 | ICWHOIW              |
| <i>ybjEp5</i>  | - | reverse | 914300 | ICWHOIW              |
| <i>macBp1</i>  | - | forward | 919317 | AIPPIW               |
| <i>macBp2</i>  | - | forward | 919560 | AIPPIW               |
| <i>ycaIp6</i>  | - | forward | 963328 | ICWHOIW              |

|                |   |         |         |                      |
|----------------|---|---------|---------|----------------------|
| <i>yccSp3</i>  | - | reverse | 1023199 | ICWHOIW              |
| <i>insFp5</i>  | - | reverse | 1094378 | ICWHOIW              |
| <i>ycdUp11</i> | - | forward | 1094982 | ICWHOIW              |
| <i>yceJp</i>   | - | reverse | 1118294 | AIPPIW, IDAIS        |
| <i>yceFp8</i>  | - | reverse | 1145830 | ICWHOIW              |
| <i>pabCp8</i>  | - | forward | 1152316 | ICWHOIW              |
| <i>ycfZp6</i>  | - | reverse | 1180569 | ICWHOIW              |
| <i>ycfZp5</i>  | - | reverse | 1180603 | ICWHOIW              |
| <i>phoPp3</i>  | - | reverse | 1189714 | AIPPIW, IDAIS, TIMIS |
| <i>croEp4</i>  | - | forward | 1202106 | ICWHOIW              |
| <i>cohEp10</i> | - | reverse | 1202311 | ICWHOIW              |
| <i>yciAp8</i>  | - | reverse | 1310438 | ICWHOIW              |
| <i>yciEp7</i>  | - | reverse | 1313345 | ICWHOIW              |
| <i>trpAp7</i>  | - | reverse | 1315363 | ICWHOIW              |
| <i>yciNp8</i>  | - | reverse | 1328726 | ICWHOIW              |
| <i>topAp1</i>  | - | forward | 1329004 | HIPPIW, IMPIW, TIMIS |
| <i>lapAp1</i>  | - | forward | 1338159 | AIPPIW, IDAIS, TIMIS |
| <i>ymjAp5</i>  | - | reverse | 1355834 | ICWHOIW              |
| <i>ycjXp</i>   | - | forward | 1382093 | AIPPIW, IDAIS, TIMIS |
| <i>mpaAp4</i>  | - | reverse | 1388663 | ICWHOIW              |
| <i>ydaSp3</i>  | - | forward | 1418194 | ICWHOIW              |
| <i>insHp3</i>  | - | reverse | 1426950 | ICWHOIW              |
| <i>ldhAp</i>   | - | reverse | 1440939 | AIPPIW, IDAIS, TIMIS |
| <i>ynbAp3</i>  | - | forward | 1475486 | ICWHOIW              |
| <i>azoRp8</i>  | - | reverse | 1481015 | ICWHOIW              |
| <i>opgDp8</i>  | - | forward | 1494679 | ICWHOIW              |
| <i>ydcXp9</i>  | - | forward | 1515378 | ICWHOIW              |
| <i>mcbRp3</i>  | - | forward | 1518120 | ICWHOIW              |
| <i>yddEp5</i>  | - | reverse | 1533893 | ICWHOIW              |
| <i>maeAp4</i>  | - | reverse | 1553751 | ICWHOIW              |
| <i>dosPp3</i>  | - | reverse | 1563767 | ICWHOIW              |
| <i>yneJp6</i>  | - | forward | 1612812 | ICWHOIW              |
| <i>dcpp3</i>   | - | reverse | 1625446 | ICWHOIW              |
| <i>tfaQp6</i>  | - | reverse | 1632980 | ICWHOIW              |
| <i>ynfCp9</i>  | - | reverse | 1655571 | ICWHOIW              |
| <i>ydgDp4</i>  | - | forward | 1669977 | ICWHOIW              |
| <i>ydgDp7</i>  | - | forward | 1669981 | ICWHOIW              |
| <i>pntBp6</i>  | - | reverse | 1674572 | ICWHOIW              |
| <i>ydgHp5</i>  | - | forward | 1676401 | ICWHOIW              |
| <i>ydhQp</i>   | - | reverse | 1744226 | AIPPIW, IDAIS, TIMIS |
| <i>ynhGp7</i>  | - | reverse | 1756968 | ICWHOIW              |

|                |   |         |         |                      |
|----------------|---|---------|---------|----------------------|
| <i>ynhGp4</i>  | - | reverse | 1756969 | ICWHOIW              |
| <i>ydiHp2</i>  | - | reverse | 1763315 | ICWHOIW              |
| <i>ydjOp4</i>  | - | reverse | 1811372 | ICWHOIW              |
| <i>ydjXp5</i>  | - | forward | 1831241 | ICWHOIW              |
| <i>msrBp5</i>  | - | reverse | 1860608 | ICWHOIW              |
| <i>gapAp2</i>  | - | forward | 1860642 | HIPPIW, IDAIS, TIMIS |
| <i>yeaQp3</i>  | - | reverse | 1877384 | ICWHOIW              |
| <i>yoaBp2</i>  | - | forward | 1891345 | ICWHOIW              |
| <i>sdaAp</i>   | - | forward | 1894833 | HIPPIW, IDAIS, TIMIS |
| <i>htpXp</i>   | - | reverse | 1910642 | HIPPIW, IDAIS, TIMIS |
| <i>pphAp</i>   | - | reverse | 1921409 | AIPPIW, TIMIS        |
| <i>purTp5</i>  | - | forward | 1928743 | ICWHOIW              |
| <i>ruvBp1</i>  | - | reverse | 1943390 | ICWHOIW              |
| <i>ruvBp4</i>  | - | reverse | 1943568 | ICWHOIW              |
| <i>cheWp5</i>  | - | reverse | 1971486 | ICWHOIW              |
| <i>araHp7</i>  | - | reverse | 1981584 | ICWHOIW              |
| <i>yecCp3</i>  | - | reverse | 1995847 | ICWHOIW              |
| <i>yedEp8</i>  | - | forward | 2006179 | ICWHOIW              |
| <i>yodCp7</i>  | - | reverse | 2026434 | ICWHOIW              |
| <i>yodBp15</i> | - | forward | 2040200 | ICWHOIW              |
| <i>yodBp13</i> | - | forward | 2040332 | ICWHOIW              |
| <i>yeeJp8</i>  | - | forward | 2042787 | ICWHOIW              |
| <i>rfcP7</i>   | - | reverse | 2105418 | ICWHOIW              |
| <i>yegSp5</i>  | - | forward | 2166582 | ICWHOIW              |
| <i>mlrAp9</i>  | - | forward | 2212807 | ICWHOIW              |
| <i>sanAp3</i>  | - | forward | 2230706 | ICWHOIW              |
| <i>mglCp5</i>  | - | reverse | 2235880 | ICWHOIW              |
| <i>yeiEp5</i>  | - | reverse | 2247733 | ICWHOIW              |
| <i>yeiQp5</i>  | - | forward | 2264186 | ICWHOIW              |
| <i>rsuAp3</i>  | - | reverse | 2278570 | ICWHOIW              |
| <i>narPp</i>   | - | forward | 2288444 | AIPPIW, IDAIS, TIMIS |
| <i>yfaEp2</i>  | - | forward | 2346360 | ICWHOIW              |
| <i>yfbLp3</i>  | - | forward | 2383782 | ICWHOIW              |
| <i>alaAp9</i>  | - | forward | 2405430 | ICWHOIW              |
| <i>yfbRp3</i>  | - | forward | 2406853 | ICWHOIW              |
| <i>dedDp2</i>  | - | reverse | 2429890 | ICWHOIW              |
| <i>dedAp2</i>  | - | reverse | 2432962 | ICWHOIW              |
| <i>smrBp4</i>  | - | forward | 2446590 | ICWHOIW              |
| <i>yfdFp4</i>  | - | forward | 2460824 | ICWHOIW              |
| <i>yfdPp5</i>  | - | forward | 2471444 | ICWHOIW              |
| <i>yfeHp3</i>  | - | forward | 2524955 | ICWHOIW              |

|                |   |         |         |                      |
|----------------|---|---------|---------|----------------------|
| <i>yffOp8</i>  | - | forward | 2559924 | ICWHOIW              |
| <i>pbpCp2</i>  | - | reverse | 2645390 | ICWHOIW              |
| <i>ryfAp11</i> | - | forward | 2651721 | ICWHOIW              |
| <i>yfhRp4</i>  | - | forward | 2662226 | ICWHOIW              |
| <i>hcaTp6</i>  | - | reverse | 2665950 | ICWHOIW              |
| <i>hcaTp7</i>  | - | reverse | 2666075 | ICWHOIW              |
| <i>yphBp3</i>  | - | reverse | 2672810 | ICWHOIW              |
| <i>pgpCp</i>   | - | reverse | 2696660 | AIPPIW               |
| <i>rrsGp1</i>  | - | reverse | 2729470 | HIPPIW               |
| <i>clpBp</i>   | - | reverse | 2732227 | HIPPIW, IDAIS, TIMIS |
| <i>raiAp</i>   | - | forward | 2735126 | IDAIS, IEPIW         |
| <i>yfiRp7</i>  | - | forward | 2739699 | ICWHOIW              |
| <i>ypjDp4</i>  | - | forward | 2745868 | ICWHOIW              |
| <i>grpEp</i>   | - | reverse | 2748769 | HIPPIW, IDAIS, TIMIS |
| <i>yfjlp10</i> | - | forward | 2756950 | ICWHOIW              |
| <i>rnlAp</i>   | - | forward | 2763928 | AIPPIW, IDAIS        |
| <i>yfjPp8</i>  | - | forward | 2765562 | ICWHOIW              |
| <i>csiRp5</i>  | - | forward | 2793665 | ICWHOIW              |
| <i>pncCp</i>   | - | reverse | 2822416 | HIPPIW, TIMIS        |
| <i>ygbLp5</i>  | - | forward | 2861559 | ICWHOIW              |
| <i>ygbLp4</i>  | - | forward | 2861591 | ICWHOIW              |
| <i>cysCp3</i>  | - | reverse | 2872050 | ICWHOIW              |
| <i>ygbFp</i>   | - | reverse | 2876937 | AIPPIW, TIMIS        |
| <i>sydp2</i>   | - | reverse | 2923391 | ICWHOIW              |
| <i>ygdIp7</i>  | - | reverse | 2941251 | ICWHOIW              |
| <i>ygdIp10</i> | - | reverse | 2941285 | ICWHOIW              |
| <i>lpITp3</i>  | - | reverse | 2971961 | ICWHOIW              |
| <i>yqeGp8</i>  | - | forward | 2983841 | ICWHOIW              |
| <i>yqeCp5</i>  | - | reverse | 3013256 | ICWHOIW              |
| <i>idip10</i>  | - | forward | 3030992 | ICWHOIW              |
| <i>xerDp</i>   | - | reverse | 3037873 | HIPPIW, IDAIS        |
| <i>yqgBp4</i>  | - | reverse | 3084204 | ICWHOIW              |
| <i>yggIp5</i>  | - | forward | 3087771 | ICWHOIW              |
| <i>yqgEp3</i>  | - | forward | 3090906 | ICWHOIW              |
| <i>rdgBp</i>   | - | forward | 3094642 | AIPPIW, TIMIS        |
| <i>yghDp4</i>  | - | reverse | 3109329 | ICWHOIW              |
| <i>yghJp7</i>  | - | reverse | 3117288 | ICWHOIW              |
| <i>yghQp8</i>  | - | reverse | 3130545 | ICWHOIW              |
| <i>yghQp7</i>  | - | reverse | 3130547 | ICWHOIW              |
| <i>yghTp4</i>  | - | forward | 3131999 | ICWHOIW              |
| <i>yqhAp7</i>  | - | reverse | 3147597 | ICWHOIW              |

|                |   |         |         |                      |
|----------------|---|---------|---------|----------------------|
| <i>yqhHp4</i>  | - | forward | 3156443 | ICWHOIW              |
| <i>ftsPp2</i>  | - | reverse | 3160888 | ICWHOIW              |
| <i>ygiVp3</i>  | - | reverse | 3167313 | ICWHOIW              |
| <i>ygiWp7</i>  | - | reverse | 3167710 | ICWHOIW              |
| <i>ygiWp5</i>  | - | reverse | 3167909 | ICWHOIW              |
| <i>glnEp5</i>  | - | reverse | 3197775 | ICWHOIW              |
| <i>rpoDp3</i>  | - | forward | 3210710 | HIPPIW, IDAIS, TIMIS |
| <i>ygjQp3</i>  | - | forward | 3234421 | ICWHOIW              |
| <i>exuRp</i>   | - | forward | 3244530 | AIPPIW               |
| <i>yqjFp3</i>  | - | forward | 3248494 | ICWHOIW              |
| <i>yqjFp4</i>  | - | forward | 3248497 | ICWHOIW              |
| <i>yhaKp3</i>  | - | forward | 3252313 | ICWHOIW              |
| <i>rsmIp8</i>  | - | reverse | 3291575 | ICWHOIW              |
| <i>yhcAp11</i> | - | forward | 3360000 | ICWHOIW              |
| <i>yhcHp2</i>  | - | reverse | 3367584 | ICWHOIW              |
| <i>aaeBp7</i>  | - | reverse | 3386258 | ICWHOIW              |
| <i>tldDp6</i>  | - | reverse | 3390097 | ICWHOIW              |
| <i>yhdJp2</i>  | - | forward | 3409639 | ICWHOIW              |
| <i>yhdVp9</i>  | - | forward | 3416218 | ICWHOIW              |
| <i>rrsDp1</i>  | - | reverse | 3427069 | HIPPIW, TIMIS        |
| <i>rsmBp4</i>  | - | forward | 3433013 | ICWHOIW              |
| <i>tusBp7</i>  | - | reverse | 3473131 | ICWHOIW              |
| <i>slyXp4</i>  | - | forward | 3475453 | ICWHOIW              |
| <i>frlAp17</i> | - | forward | 3497781 | ICWHOIW              |
| <i>frlAp5</i>  | - | forward | 3497792 | ICWHOIW              |
| <i>hslRp</i>   | - | forward | 3527132 | AIPPIW, TIMIS        |
| <i>greBp7</i>  | - | forward | 3534802 | ICWHOIW              |
| <i>yhgAp6</i>  | - | forward | 3541169 | ICWHOIW              |
| <i>nfuAp2</i>  | - | forward | 3543480 | AIPPIW, TIMIS        |
| <i>glgPp1</i>  | - | reverse | 3564796 | ICWHOIW              |
| <i>gntUp2</i>  | - | reverse | 3575108 | ICWHOIW              |
| <i>yhhXp4</i>  | - | reverse | 3578882 | ICWHOIW              |
| <i>yhhAp6</i>  | - | forward | 3584752 | ICWHOIW              |
| <i>dcrBp6</i>  | - | forward | 3607953 | ICWHOIW              |
| <i>yhhJp3</i>  | - | reverse | 3624871 | ICWHOIW              |
| <i>priCp</i>   | - | reverse | 3643261 | AIPPIW, IDAIS, IEPIW |
| <i>yhjVp3</i>  | - | forward | 3698421 | ICWHOIW              |
| <i>yiaDp4</i>  | - | forward | 3714379 | ICWHOIW              |
| <i>rfaDp3</i>  | - | forward | 3791888 | TIMIS                |
| <i>mutMp</i>   | - | reverse | 3809198 | AIPPIW, TIMIS        |
| <i>mutMp2</i>  | - | reverse | 3809300 | AIPPIW               |

|               |   |         |         |                       |
|---------------|---|---------|---------|-----------------------|
| <i>pyrEp4</i> | - | reverse | 3814008 | ICWHOIW               |
| <i>ligBp4</i> | - | reverse | 3819311 | ICWHOIW               |
| <i>yidFp5</i> | - | reverse | 3853813 | ICWHOIW               |
| <i>cbrAp6</i> | - | forward | 3867337 | ICWHOIW               |
| <i>rarDp4</i> | - | reverse | 4002264 | ICWHOIW               |
| <i>rarDp5</i> | - | reverse | 4002320 | ICWHOIW               |
| <i>pIdBp6</i> | - | forward | 4007037 | ICWHOIW               |
| <i>rrsAp1</i> | - | forward | 4033262 | HIPPIW                |
| <i>yihAp9</i> | - | reverse | 4049008 | ICWHOIW               |
| <i>hslVp</i>  | - | reverse | 4120377 | HIPPIW, IDAIS, TIMIS  |
| <i>rpmEp</i>  | - | forward | 4124931 | HTTIMIS, IDAIS, TIMIS |
| <i>gldAp4</i> | - | reverse | 4137069 | ICWHOIW               |
| <i>pflDp2</i> | - | forward | 4141903 | ICWHOIW               |
| <i>yijOp5</i> | - | reverse | 4146452 | ICWHOIW               |
| <i>trmAp</i>  | - | reverse | 4161318 | HIPPIW, TIMIS         |
| <i>rrsBp1</i> | - | forward | 4164390 | HIPPIW, TIMIS         |
| <i>yjaZp</i>  | - | forward | 4187776 | HIPPIW, TIMIS         |
| <i>rrsEp</i>  | - | forward | 4205886 | HIPPIW                |
| <i>metAp1</i> | - | forward | 4212256 | TIMIS                 |
| <i>zurp7</i>  | - | reverse | 4258137 | ICWHOIW               |
| <i>dusAp9</i> | - | forward | 4259623 | ICWHOIW               |
| <i>yjcDp7</i> | - | forward | 4276337 | ICWHOIW               |
| <i>yjcOp4</i> | - | reverse | 4295157 | ICWHOIW               |
| <i>yjcOp5</i> | - | reverse | 4295245 | ICWHOIW               |
| <i>alsKp1</i> | - | reverse | 4306018 | ICWHOIW               |
| <i>alsEp3</i> | - | reverse | 4306690 | ICWHOIW               |
| <i>adiCp7</i> | - | reverse | 4335225 | ICWHOIW               |
| <i>groSp</i>  | - | forward | 4368639 | AIPPIW, HIPPIW, IDAIS |
| <i>yjeJp7</i> | - | reverse | 4372392 | ICWHOIW               |
| <i>mutLp2</i> | - | forward | 4395069 | HIPPIW, IDAIS, TIMIS  |
| <i>miaAp2</i> | - | forward | 4397005 | HIPPIW, IDAIS, TIMIS  |
| <i>yjfZp7</i> | - | reverse | 4425549 | ICWHOIW               |
| <i>holCp</i>  | - | reverse | 4482296 | AIPPIW, IDAIS, TIMIS  |
| <i>yjhBp2</i> | - | forward | 4502043 | ICWHOIW               |
| <i>fecEp3</i> | - | reverse | 4509553 | ICWHOIW               |
| <i>fecEp4</i> | - | reverse | 4509667 | ICWHOIW               |
| <i>yjiLp2</i> | - | reverse | 4562816 | ICWHOIW               |
| <i>yjiLp3</i> | - | reverse | 4562825 | ICWHOIW               |
| <i>yjiAp6</i> | - | reverse | 4587018 | ICWHOIW               |
| <i>lplAp2</i> | - | reverse | 4622261 | ICWHOIW               |
| <i>sItp7</i>  | - | forward | 4628723 | ICWHOIW               |

**[B] Promoters identified as the constitutive promoters by SELEX**

|               |      |         |         |                        |
|---------------|------|---------|---------|------------------------|
| <i>ybeDp</i>  | 20.1 | reverse | 661929  | HIPPIW, IDAIS, IEPIW   |
| <i>fxsAp</i>  | 19.2 | forward | 4366626 | HIPPIW, IDAIS, TIMIS   |
| <i>rlmEp2</i> | 14.1 | reverse | 3325753 | HIPPIW, IDAIS, TIMIS   |
| <i>bssSp2</i> | 5.4  | reverse | 1120255 | AIPPIW, IDAIS, TIMIS   |
| <i>bssSp1</i> | 5.4  | reverse | 1120281 | AIPPIW, IDAIS, IEPIW   |
| <i>ibpAp</i>  | 4.6  | reverse | 3865541 | HIPPIW, IDAIS, TIMIS   |
| <i>ycjZp7</i> | 4.4  | forward | 1389896 | ICWHOIW                |
| <i>ycjYp6</i> | 4.4  | reverse | 1390096 | ICWHOIW                |
| <i>canp</i>   | 3.9  | reverse | 142703  | AIPPIW, HTTIMIS, IDAIS |
| <i>rrsCp1</i> | 3.6  | forward | 3939539 | AIPPIW, HIPPIW         |
| <i>creAp2</i> | 3.3  | forward | 4633266 | HIPPIW, TIMIS          |
| <i>cldp7</i>  | 3.2  | reverse | 2096437 | ICWHOIW                |
| <i>ydfAp6</i> | 3.2  | forward | 1646481 | ICWHOIW                |
| <i>dnaKp1</i> | 3.2  | forward | 12048   | HIPPIW, IDAIS, TIMIS   |
| <i>dnaKp2</i> | 3.2  | forward | 12123   | HIPPIW, IDAIS, TIMIS   |
| <i>dnaKp3</i> | 3.2  | forward | 12144   | HIPPIW, IDAIS, TIMIS   |
| <i>ybgSp8</i> | 3.0  | reverse | 784719  | ICWHOIW                |
| <i>yneKp6</i> | 3.0  | forward | 1613574 | ICWHOIW                |
| <i>iapp7</i>  | 2.9  | forward | 2874558 | ICWHOIW                |
| <i>yhdNp</i>  | 2.9  | reverse | 3437568 | AIPPIW, IDAIS, TIMIS   |
| <i>rfbXp5</i> | 2.8  | reverse | 2107700 | ICWHOIW                |
| <i>ackAp</i>  | 2.7  | forward | 2411481 | AIPPIW                 |
| <i>hspQp</i>  | 2.7  | reverse | 0       | IDAIS, IEPIW           |
| <i>ygeWp6</i> | 2.7  | forward | 3004139 | ICWHOIW                |
| <i>ygeWp5</i> | 2.7  | forward | 3004140 | ICWHOIW                |
| <i>yagNp4</i> | 2.6  | reverse | 294895  | ICWHOIW                |
| <i>prfCp2</i> | 2.5  | forward | 4607367 | ICWHOIW                |
| <i>yhcOp3</i> | 2.5  | reverse | 3384325 | ICWHOIW                |
| <i>ynfAp4</i> | 2.4  | reverse | 1653723 | ICWHOIW                |
| <i>yjfPp4</i> | 2.3  | forward | 4414779 | ICWHOIW                |
| <i>yibAp</i>  | 2.2  | forward | 0       | IDAIS, IEPIW           |
| <i>mppAp4</i> | 2.2  | forward | 1391228 | ICWHOIW                |
| <i>yedYp4</i> | 2.2  | forward | 2037310 | ICWHOIW                |
| <i>yihVp6</i> | 2.2  | forward | 4071555 | ICWHOIW                |
| <i>ypjMp</i>  | 2.2  | reverse | 0       | IDAIS, IEPIW           |
| <i>yfjXp2</i> | 2.2  | forward | 2773910 | ICWHOIW                |
| <i>yjgBp9</i> | 2.2  | reverse | 4494370 | ICWHOIW                |
| <i>yjgBp8</i> | 2.2  | reverse | 4494372 | ICWHOIW                |
| <i>cspHp8</i> | 2.1  | reverse | 1050428 | ICWHOIW                |



|                       |            |                |                |                |
|-----------------------|------------|----------------|----------------|----------------|
| <b><i>cspHp12</i></b> | <b>2.1</b> | <b>reverse</b> | <b>1050507</b> | <b>ICWHOIW</b> |
| <b><i>ycaKp4</i></b>  | <b>2.0</b> | <b>forward</b> | <b>948797</b>  | <b>ICWHOIW</b> |
