# Supplementary material for: The whole set of the constitutive promoters recognized by four minor sigma subunits of Escherichia coli RNA polymerase
Source: PubMed Central journal article supplement (PMC5493296; doi:10.1371/journal.pone.0179181), 2017-06-30
Supplement: pone.0179181.s003.pdf [file pone.0179181.s003.pdf]

**S3 Table**  
**RpoF promoters (RegulonDB)**

**[A] Promoters not identified as the constitutive promoters**

| Promoter      | SELEX | Direction | Genome position | Evidence      |
|---------------|-------|-----------|-----------------|---------------|
| <i>yjcSp</i>  | -     | reverse   | 0               | HIPPIW        |
| <i>fliDp1</i> | -     | forward   | 0               | HIPPIW        |
| <i>insLp6</i> | -     | forward   | 15436           | ICWHOIW       |
| <i>caiEp7</i> | -     | reverse   | 35399           | ICWHOIW       |
| <i>caiEp3</i> | -     | reverse   | 35499           | ICWHOIW       |
| <i>hemLp1</i> | -     | reverse   | 174902          | HIPPIW, IEPIW |
| <i>hemLp</i>  | -     | reverse   | 174921          | TIMIS         |
| <i>hemLp2</i> | -     | reverse   | 174941          | HIPPIW        |
| <i>dxrp4</i>  | -     | forward   | 193338          | ICWHOIW       |
| <i>ykfBp1</i> | -     | reverse   | 265382          | HIPPIW        |
| <i>ykfBp2</i> | -     | reverse   | 265451          | HIPPIW        |
| <i>yagGp9</i> | -     | forward   | 284431          | ICWHOIW       |
| <i>ykgCp8</i> | -     | reverse   | 319312          | ICWHOIW       |
| <i>yailp3</i> | -     | forward   | 404947          | ICWHOIW       |
| <i>ampGp6</i> | -     | reverse   | 452908          | ICWHOIW       |
| <i>ybaYp3</i> | -     | forward   | 474469          | ICWHOIW       |
| <i>ybaMp3</i> | -     | reverse   | 489548          | ICWHOIW       |
| <i>ybaNp9</i> | -     | forward   | 490103          | ICWHOIW       |
| <i>ybbJp1</i> | -     | reverse   | 514301          | ICWHOIW       |
| <i>ybdJp5</i> | -     | reverse   | 605487          | ICWHOIW       |
| <i>insLp5</i> | -     | forward   | 607279          | ICWHOIW       |
| <i>rnkp7</i>  | -     | reverse   | 643403          | ICWHOIW       |
| <i>cobCp6</i> | -     | reverse   | 669269          | ICWHOIW       |
| <i>ybfAp8</i> | -     | forward   | 728305          | ICWHOIW       |
| <i>galMp4</i> | -     | reverse   | 788121          | ICWHOIW       |
| <i>ybhNp5</i> | -     | reverse   | 821871          | ICWHOIW       |
| <i>ybiXp2</i> | -     | reverse   | 838497          | ICWHOIW       |
| <i>ybiWp4</i> | -     | reverse   | 862006          | ICWHOIW       |
| <i>clpSp7</i> | -     | forward   | 922135          | ICWHOIW       |
| <i>ycalp8</i> | -     | forward   | 963331          | ICWHOIW       |
| <i>torTp7</i> | -     | forward   | 1055430         | ICWHOIW       |
| <i>ymdAp9</i> | -     | forward   | 1104635         | ICWHOIW       |
| <i>ycelp5</i> | -     | reverse   | 1117864         | ICWHOIW       |
| <i>lolCp6</i> | -     | forward   | 1174597         | ICWHOIW       |
| <i>ycfDp5</i> | -     | reverse   | 1187493         | ICWHOIW       |

|                |   |         |         |                 |
|----------------|---|---------|---------|-----------------|
| <i>nudJp6</i>  | - | reverse | 1193660 | ICWHOIW         |
| <i>ymgEp7</i>  | - | forward | 1243778 | ICWHOIW         |
| <i>lolBp</i>   | - | reverse | 1262779 | HIPPIW          |
| <i>trpAp8</i>  | - | reverse | 1315265 | ICWHOIW         |
| <i>pgpBp8</i>  | - | forward | 1337206 | ICWHOIW         |
| <i>insHp7</i>  | - | forward | 1393995 | ICWHOIW         |
| <i>ydcFp4</i>  | - | forward | 1485255 | ICWHOIW         |
| <i>trgp1</i>   | - | forward | 1490463 | HIPPIW, HTTIMIS |
| <i>yncDp11</i> | - | reverse | 1521300 | ICWHOIW         |
| <i>vesp</i>    | - | reverse | 1823008 | TIMIS           |
| <i>ynjFp6</i>  | - | reverse | 1839635 | ICWHOIW         |
| <i>ynjHp</i>   | - | reverse | 1840187 | AIPPIW, HIPPIW  |
| <i>ynjHp2</i>  | - | reverse | 1840212 | HIPPIW          |
| <i>dmlAp4</i>  | - | forward | 1879736 | ICWHOIW         |
| <i>yoaCp7</i>  | - | reverse | 1892136 | ICWHOIW         |
| <i>prcp1</i>   | - | reverse | 1913051 | ICWHOIW         |
| <i>tarp</i>    | - | reverse | 1970740 | HIPPIW, TIMIS   |
| <i>flhCp3</i>  | - | reverse | 1975956 | ICWHOIW         |
| <i>yecJp4</i>  | - | reverse | 1985826 | ICWHOIW         |
| <i>yecFp</i>   | - | forward | 1993741 | HIPPIW          |
| <i>fliCp</i>   | - | reverse | 2001700 | FPIS, HIPPIW    |
| <i>fliFp</i>   | - | forward | 2011229 | HIPPIW          |
| <i>fliLp2</i>  | - | forward | 2017619 | HIPPIW, TIMIS   |
| <i>yedVp6</i>  | - | reverse | 2036226 | ICWHOIW         |
| <i>yodBp14</i> | - | forward | 2040285 | ICWHOIW         |
| <i>insHp4</i>  | - | reverse | 2065535 | ICWHOIW         |
| <i>yeiRp3</i>  | - | forward | 2265764 | ICWHOIW         |
| <i>ecop7</i>   | - | forward | 2301873 | ICWHOIW         |
| <i>rscCp5</i>  | - | reverse | 2318001 | ICWHOIW         |
| <i>yfaDp5</i>  | - | forward | 2354712 | ICWHOIW         |
| <i>yfdPp9</i>  | - | forward | 2471594 | ICWHOIW         |
| <i>insLp5</i>  | - | forward | 2512344 | ICWHOIW         |
| <i>yfeXp5</i>  | - | reverse | 2548700 | ICWHOIW         |
| <i>yfeZp3</i>  | - | reverse | 2549943 | ICWHOIW         |
| <i>ppkp5</i>   | - | forward | 2620896 | ICWHOIW         |
| <i>pbpCp1</i>  | - | reverse | 2645515 | ICWHOIW         |
| <i>yphBp2</i>  | - | reverse | 2672817 | ICWHOIW         |
| <i>kgtPp7</i>  | - | reverse | 2723782 | ICWHOIW         |
| <i>yfiRp8</i>  | - | forward | 2739724 | ICWHOIW         |
| <i>ygbKp</i>   | - | forward | 2860219 | HIPPIW          |
| <i>ispFp2</i>  | - | reverse | 2869933 | ICWHOIW         |

|                |   |         |         |                |
|----------------|---|---------|---------|----------------|
| <i>ygdGp2</i>  | - | forward | 2928895 | ICWHOIW        |
| <i>ygdRp5</i>  | - | forward | 2969269 | ICWHOIW        |
| <i>yqelp8</i>  | - | forward | 2986437 | ICWHOIW        |
| <i>yggLp3</i>  | - | reverse | 3100276 | ICWHOIW        |
| <i>glcAp12</i> | - | reverse | 3119343 | ICWHOIW        |
| <i>aerp</i>    | - | reverse | 3217142 | HIPPIW, TIMIS  |
| <i>ygjQp6</i>  | - | forward | 3234484 | ICWHOIW        |
| <i>alxp3</i>   | - | forward | 3236577 | ICWHOIW        |
| <i>rsmlp6</i>  | - | reverse | 3291415 | ICWHOIW        |
| <i>yraQp4</i>  | - | reverse | 3296229 | ICWHOIW        |
| <i>nlplp2</i>  | - | reverse | 3307062 | ICWHOIW        |
| <i>yhcFp5</i>  | - | forward | 3364911 | ICWHOIW        |
| <i>yhcMp4</i>  | - | reverse | 3378141 | ICWHOIW        |
| <i>tldDp7</i>  | - | reverse | 3390206 | ICWHOIW        |
| <i>rrfFp2</i>  | - | reverse | 3421729 | ICWHOIW        |
| <i>slyDp5</i>  | - | reverse | 3476562 | ICWHOIW        |
| <i>nudEp9</i>  | - | reverse | 3524351 | ICWHOIW        |
| <i>yrfFp12</i> | - | forward | 3524425 | ICWHOIW        |
| <i>hslOp3</i>  | - | forward | 3527755 | ICWHOIW        |
| <i>rtcAp6</i>  | - | reverse | 3554970 | ICWHOIW        |
| <i>rsmDp11</i> | - | forward | 3602338 | ICWHOIW        |
| <i>dcrBp8</i>  | - | forward | 3607936 | ICWHOIW        |
| <i>yhiMp10</i> | - | forward | 3632658 | ICWHOIW        |
| <i>yhjHp</i>   | - | reverse | 3677252 | AIPPIW, HIPPIW |
| <i>ghrBp2</i>  | - | forward | 3715212 | ICWHOIW        |
| <i>glmSp2</i>  | - | reverse | 3911834 | ICWHOIW        |
| <i>hsrAp6</i>  | - | reverse | 3938729 | ICWHOIW        |
| <i>aspTp1</i>  | - | forward | 3944803 | ICWHOIW        |
| <i>trpTp2</i>  | - | forward | 3944803 | ICWHOIW        |
| <i>hdfRp6</i>  | - | reverse | 3946183 | ICWHOIW        |
| <i>yifBp9</i>  | - | forward | 3948007 | ICWHOIW        |
| <i>rhtCp2</i>  | - | forward | 4005762 | ICWHOIW        |
| <i>ubiEp4</i>  | - | forward | 4016770 | ICWHOIW        |
| <i>yihOp3</i>  | - | reverse | 4063994 | ICWHOIW        |
| <i>frvRp4</i>  | - | reverse | 4087925 | ICWHOIW        |
| <i>pflDp4</i>  | - | forward | 4141881 | ICWHOIW        |
| <i>yjaHp1</i>  | - | forward | 4198534 | ICWHOIW        |
| <i>purDp1</i>  | - | reverse | 4204009 | ICWHOIW        |
| <i>yjaAp4</i>  | - | forward | 4211143 | ICWHOIW        |
| <i>rluFp6</i>  | - | forward | 4228185 | ICWHOIW        |
| <i>yjdAp2</i>  | - | forward | 4325087 | HIPPIW         |

|                |   |         |         |         |
|----------------|---|---------|---------|---------|
| <i>yjdAp1</i>  | - | forward | 4325102 | HIPPIW  |
| <i>ytfIp11</i> | - | forward | 4435640 | ICWHOIW |
| <i>yjgAp11</i> | - | reverse | 4456069 | ICWHOIW |
| <i>yjgAp9</i>  | - | reverse | 4456088 | ICWHOIW |
| <i>yjgAp5</i>  | - | reverse | 4456104 | ICWHOIW |
| <i>tabAp5</i>  | - | forward | 4472806 | ICWHOIW |
| <i>yjhUp8</i>  | - | reverse | 4518563 | ICWHOIW |

**[B] Promoters identified as the constitutive promoters by SELEX**

|               |      |         |         |                |
|---------------|------|---------|---------|----------------|
| <i>fliAp2</i> | 46.2 | reverse | 1999832 | HIPPIW, TIMIS  |
| <i>flgKp</i>  | 27.2 | forward | 1137574 | HIPPIW         |
| <i>flxAp</i>  | 23.2 | forward | 1644412 | AIPPIW, HIPPIW |
| <i>flgMp</i>  | 15.0 | reverse | 1129388 | HIPPIW         |
| <i>modAp1</i> | 9.2  | forward | 794218  | HIPPIW         |
| <i>yecHp5</i> | 7.9  | reverse | 1987676 | ICWHOIW        |
| <i>tsrp</i>   | 5.3  | forward | 4589656 | HIPPIW         |
| <i>yhiLp</i>  | 4.8  | reverse | 0       | HIPPIW         |
| <i>ycgRp</i>  | 4.6  | reverse | 1243779 | HIPPIW         |
| <i>greBp8</i> | 4.3  | forward | 3534766 | ICWHOIW        |
| <i>chbGp5</i> | 4.2  | reverse | 1815336 | ICWHOIW        |
| <i>cldp10</i> | 3.5  | reverse | 2096499 | ICWHOIW        |
| <i>fliEp</i>  | 3.4  | reverse | 2011117 | HIPPIW         |
| <i>adhPp5</i> | 3.3  | reverse | 1552018 | ICWHOIW        |
| <i>ppdAp</i>  | 3.2  | reverse | 2962242 | HIPPIW         |
| <i>motAp</i>  | 3.1  | reverse | 1975326 | HIPPIW         |
| <i>fryAp6</i> | 2.9  | reverse | 2502515 | ICWHOIW        |
| <i>yjcOp3</i> | 2.9  | reverse | 4295353 | ICWHOIW        |
| <i>oppAp</i>  | 2.2  | forward | 1299109 | AIPPIW, NTASIW |
| <i>yjdLp4</i> | 2.1  | reverse | 4354530 | ICWHOIW        |
