# Supplementary material for: The whole set of the constitutive promoters recognized by four minor sigma subunits of Escherichia coli RNA polymerase
Source: PubMed Central journal article supplement (PMC5493296; doi:10.1371/journal.pone.0179181), 2017-06-30
Supplement: pone.0179181.s004.pdf [file pone.0179181.s004.pdf]

**S4 Table**  
**RpoE promoters (RegulonDB)**

**[A] Promoters not identified as the constitutive promoters**

| Promoter       | SELEX | Direction | Genome position | Evidence        |
|----------------|-------|-----------|-----------------|-----------------|
| <i>surAp</i>   | -     | reverse   | 0               | NTASIW, TASESIW |
| <i>yaaAp3</i>  | -     | reverse   | 6587            | ICWHOIW         |
| <i>apaHp4</i>  | -     | reverse   | 51293           | ICWHOIW         |
| <i>impp3</i>   | -     | reverse   | 57336           | HIPPIW, TIMIS   |
| <i>rluAp1</i>  | -     | reverse   | 60450           | ICWHOIW         |
| <i>leuDp4</i>  | -     | reverse   | 79594           | ICWHOIW         |
| <i>ampDp5</i>  | -     | forward   | 118681          | ICWHOIW         |
| <i>yadEp3</i>  | -     | forward   | 144965          | ICWHOIW         |
| <i>panCp2</i>  | -     | reverse   | 148920          | ICWHOIW         |
| <i>yadNp1</i>  | -     | reverse   | 156984          | ICWHOIW         |
| <i>gluQp1</i>  | -     | reverse   | 160143          | ICWHOIW         |
| <i>yadSp7</i>  | -     | reverse   | 177757          | ICWHOIW         |
| <i>degPp</i>   | -     | forward   | 180845          | HIPPIW, TIMIS   |
| <i>frrp6</i>   | -     | forward   | 192849          | ICWHOIW         |
| <i>dxrp5</i>   | -     | forward   | 193411          | ICWHOIW         |
| <i>dxrp1</i>   | -     | forward   | 193471          | ICWHOIW         |
| <i>rsePp</i>   | -     | forward   | 196470          | HIPPIW, TIMIS   |
| <i>bamAp2</i>  | -     | forward   | 197026          | AIPPIW          |
| <i>bamAp</i>   | -     | forward   | 197821          | HIPPIW, TIMIS   |
| <i>hlpAp</i>   | -     | forward   | 200455          | HIPPIW, TIMIS   |
| <i>lpxDp</i>   | -     | forward   | 200960          | HIPPIW, TIMIS   |
| <i>yaeFp1</i>  | -     | reverse   | 217135          | ICWHOIW         |
| <i>lpcAp1</i>  | -     | forward   | 243468          | ICWHOIW         |
| <i>ykflp7</i>  | -     | reverse   | 263042          | ICWHOIW         |
| <i>mmuPp1</i>  | -     | forward   | 274343          | ICWHOIW         |
| <i>mmuPp2</i>  | -     | forward   | 274539          | ICWHOIW         |
| <i>ykgJp2</i>  | -     | reverse   | 303482          | ICWHOIW         |
| <i>matAp1</i>  | -     | reverse   | 310617          | ICWHOIW         |
| <i>matAp5</i>  | -     | reverse   | 310670          | ICWHOIW         |
| <i>ykgLp1</i>  | -     | forward   | 311163          | ICWHOIW         |
| <i>ykgBp3</i>  | -     | reverse   | 317600          | ICWHOIW         |
| <i>yaiOp6</i>  | -     | reverse   | 380074          | ICWHOIW         |
| <i>yaiPp5</i>  | -     | reverse   | 383209          | ICWHOIW         |
| <i>yaiSp13</i> | -     | reverse   | 383962          | ICWHOIW         |
| <i>insFp4</i>  | -     | reverse   | 391884          | ICWHOIW         |

|               |   |         |        |                       |
|---------------|---|---------|--------|-----------------------|
| <i>sbmAp</i>  | - | forward | 395777 | AIPPIW, HIPPIW, TIMIS |
| <i>yailp7</i> | - | forward | 404922 | ICWHOIW               |
| <i>sbcCp2</i> | - | reverse | 415071 | ICWHOIW               |
| <i>yajlp6</i> | - | reverse | 432258 | ICWHOIW               |
| <i>ampGp5</i> | - | reverse | 452851 | ICWHOIW               |
| <i>clpXp</i>  | - | forward | 456426 | AIPPIW, TIMIS         |
| <i>fadMp1</i> | - | forward | 463584 | ICWHOIW               |
| <i>ybaNp1</i> | - | forward | 489942 | ICWHOIW               |
| <i>ybaBp</i>  | - | forward | 492933 | AIPPIW, TIMIS         |
| <i>ybaPp6</i> | - | reverse | 507508 | ICWHOIW               |
| <i>ylbAp2</i> | - | reverse | 543280 | ICWHOIW               |
| <i>fimZp3</i> | - | reverse | 563830 | ICWHOIW               |
| <i>intDp6</i> | - | reverse | 565324 | ICWHOIW               |
| <i>essDp</i>  | - | forward | 576096 | AIPPIW, TIMIS         |
| <i>ybcWp4</i> | - | forward | 579028 | ICWHOIW               |
| <i>ybcHp4</i> | - | reverse | 587293 | ICWHOIW               |
| <i>ybdFp5</i> | - | reverse | 605276 | ICWHOIW               |
| <i>ybdKp3</i> | - | reverse | 606784 | ICWHOIW               |
| <i>hokEp</i>  | - | forward | 606954 | AIPPIW                |
| <i>ybdDp2</i> | - | forward | 631214 | ICWHOIW               |
| <i>ybdMp2</i> | - | reverse | 634778 | ICWHOIW               |
| <i>ahpFp</i>  | - | forward | 638225 | AIPPIW, TIMIS         |
| <i>citTp4</i> | - | reverse | 645855 | ICWHOIW               |
| <i>crcBp4</i> | - | reverse | 657231 | ICWHOIW               |
| <i>lipBp2</i> | - | reverse | 661624 | ICWHOIW               |
| <i>dacAp2</i> | - | reverse | 663190 | ICWHOIW               |
| <i>cobCp7</i> | - | reverse | 669167 | ICWHOIW               |
| <i>ybeRp7</i> | - | forward | 675783 | ICWHOIW               |
| <i>ybeQp1</i> | - | reverse | 675929 | ICWHOIW               |
| <i>rihAp3</i> | - | reverse | 683825 | ICWHOIW               |
| <i>insHp3</i> | - | reverse | 688428 | ICWHOIW               |
| <i>Intp4</i>  | - | reverse | 690207 | ICWHOIW               |
| <i>ybfFp1</i> | - | reverse | 712069 | ICWHOIW               |
| <i>ybfHp</i>  | - | reverse | 715864 | AIPPIW, TIMIS         |
| <i>potEp1</i> | - | reverse | 717567 | ICWHOIW               |
| <i>ybfAp7</i> | - | forward | 728260 | ICWHOIW               |
| <i>ybgOp4</i> | - | reverse | 748405 | ICWHOIW               |
| <i>ybgDp9</i> | - | reverse | 752181 | ICWHOIW               |
| <i>ybgSp2</i> | - | reverse | 784682 | ICWHOIW               |
| <i>ybhHp8</i> | - | forward | 799775 | ICWHOIW               |
| <i>rlmFp1</i> | - | forward | 841415 | ICWHOIW               |

|                |   |         |         |               |
|----------------|---|---------|---------|---------------|
| <i>ybiUp5</i>  | - | reverse | 858323  | ICWHOIW       |
| <i>ybjOp4</i>  | - | forward | 897075  | ICWHOIW       |
| <i>hcrp3</i>   | - | reverse | 911423  | ICWHOIW       |
| <i>hcpp2</i>   | - | reverse | 913352  | AIPPIW, TIMIS |
| <i>ybjEp3</i>  | - | reverse | 914124  | ICWHOIW       |
| <i>aqpZp2</i>  | - | reverse | 915435  | ICWHOIW       |
| <i>cydCp5</i>  | - | reverse | 928623  | ICWHOIW       |
| <i>ycaLp1</i>  | - | forward | 959355  | ICWHOIW       |
| <i>ycaLp8</i>  | - | forward | 959366  | ICWHOIW       |
| <i>elfAp6</i>  | - | forward | 996988  | ICWHOIW       |
| <i>elfDp1</i>  | - | forward | 997544  | ICWHOIW       |
| <i>yccXp7</i>  | - | forward | 1029217 | ICWHOIW       |
| <i>gfcAp1</i>  | - | reverse | 1049057 | ICWHOIW       |
| <i>torTp1</i>  | - | forward | 1055443 | ICWHOIW       |
| <i>torTp2</i>  | - | forward | 1055445 | ICWHOIW       |
| <i>rutGp2</i>  | - | reverse | 1069268 | ICWHOIW       |
| <i>rutRp</i>   | - | forward | 1073357 | AIPPIW, TIMIS |
| <i>insFp4</i>  | - | reverse | 1094419 | ICWHOIW       |
| <i>ycdUp9</i>  | - | forward | 1094856 | ICWHOIW       |
| <i>ycdUp1</i>  | - | forward | 1094916 | ICWHOIW       |
| <i>csgGp1</i>  | - | reverse | 1100978 | ICWHOIW       |
| <i>ymdBp4</i>  | - | forward | 1104961 | ICWHOIW       |
| <i>yceOp1</i>  | - | reverse | 1118734 | ICWHOIW       |
| <i>yceOp7</i>  | - | reverse | 1118855 | ICWHOIW       |
| <i>yceHp2</i>  | - | forward | 1125304 | ICWHOIW       |
| <i>yceMp4</i>  | - | forward | 1125827 | ICWHOIW       |
| <i>flgNp1</i>  | - | reverse | 1129137 | ICWHOIW       |
| <i>yceFp9</i>  | - | reverse | 1145972 | ICWHOIW       |
| <i>pabCp5</i>  | - | forward | 1152417 | ICWHOIW       |
| <i>pabCp1</i>  | - | forward | 1152516 | ICWHOIW       |
| <i>bhsAp</i>   | - | forward | 1168256 | HTTIMIS       |
| <i>ycfTp9</i>  | - | reverse | 1174548 | ICWHOIW       |
| <i>ycfTp11</i> | - | reverse | 1174552 | ICWHOIW       |
| <i>phoQp5</i>  | - | reverse | 1189163 | ICWHOIW       |
| <i>litp1</i>   | - | forward | 1197739 | ICWHOIW       |
| <i>ymflp1</i>  | - | forward | 1200663 | ICWHOIW       |
| <i>ymfJp9</i>  | - | reverse | 1201482 | ICWHOIW       |
| <i>tfaEp6</i>  | - | reverse | 1208412 | ICWHOIW       |
| <i>tfaEp1</i>  | - | reverse | 1208489 | ICWHOIW       |
| <i>mcrAp7</i>  | - | forward | 1209362 | ICWHOIW       |
| <i>mcrAp10</i> | - | forward | 1209418 | ICWHOIW       |

|               |   |         |         |               |
|---------------|---|---------|---------|---------------|
| <i>minEp3</i> | - | reverse | 1223934 | ICWHOIW       |
| <i>ldcAp9</i> | - | reverse | 1242420 | ICWHOIW       |
| <i>ymgEp6</i> | - | forward | 1243802 | ICWHOIW       |
| <i>ycgYp1</i> | - | forward | 1244306 | ICWHOIW       |
| <i>ycgYp6</i> | - | forward | 1244324 | ICWHOIW       |
| <i>ychnp4</i> | - | reverse | 1272878 | ICWHOIW       |
| <i>tdkp1</i>  | - | forward | 1292739 | ICWHOIW       |
| <i>yciUp5</i> | - | reverse | 1305376 | ICWHOIW       |
| <i>yciBp3</i> | - | reverse | 1311079 | ICWHOIW       |
| <i>yciEp6</i> | - | reverse | 1313262 | ICWHOIW       |
| <i>yciNp9</i> | - | reverse | 1328781 | ICWHOIW       |
| <i>pgpBp5</i> | - | forward | 1337217 | ICWHOIW       |
| <i>yciTp1</i> | - | reverse | 1342568 | ICWHOIW       |
| <i>yciWp4</i> | - | reverse | 1348260 | ICWHOIW       |
| <i>ycjDp4</i> | - | reverse | 1349890 | ICWHOIW       |
| <i>sapFp5</i> | - | reverse | 1350681 | ICWHOIW       |
| <i>ycjMp4</i> | - | forward | 1368027 | ICWHOIW       |
| <i>smrAp1</i> | - | forward | 1403960 | ICWHOIW       |
| <i>dbpAp2</i> | - | forward | 1407362 | ICWHOIW       |
| <i>intRp4</i> | - | reverse | 1411284 | ICWHOIW       |
| <i>racCp4</i> | - | reverse | 1415835 | ICWHOIW       |
| <i>racCp6</i> | - | reverse | 1415839 | ICWHOIW       |
| <i>pinRp1</i> | - | reverse | 1431736 | ICWHOIW       |
| <i>ydbJp1</i> | - | forward | 1438880 | ICWHOIW       |
| <i>azoRp1</i> | - | reverse | 1480897 | ICWHOIW       |
| <i>azoRp6</i> | - | reverse | 1480951 | ICWHOIW       |
| <i>ydcAp6</i> | - | forward | 1489671 | ICWHOIW       |
| <i>ydcAp7</i> | - | forward | 1489677 | ICWHOIW       |
| <i>opgDp4</i> | - | forward | 1494669 | ICWHOIW       |
| <i>ydcKp8</i> | - | reverse | 1498664 | ICWHOIW       |
| <i>ydcLp7</i> | - | forward | 1500347 | ICWHOIW       |
| <i>patDp3</i> | - | forward | 1513439 | ICWHOIW       |
| <i>patDp4</i> | - | forward | 1513464 | ICWHOIW       |
| <i>ydcXp1</i> | - | forward | 1515245 | ICWHOIW       |
| <i>ydcZp1</i> | - | reverse | 1516399 | ICWHOIW       |
| <i>yncBp4</i> | - | forward | 1516916 | ICWHOIW       |
| <i>pptAp7</i> | - | forward | 1530882 | ICWHOIW       |
| <i>nhoAp2</i> | - | forward | 1531987 | ICWHOIW       |
| <i>narWp</i>  | - | reverse | 1536711 | AIPPIW, TIMIS |
| <i>gadCp5</i> | - | reverse | 1568551 | ICWHOIW       |
| <i>gadCp6</i> | - | reverse | 1568601 | ICWHOIW       |

|                |   |         |         |                       |
|----------------|---|---------|---------|-----------------------|
| <i>gadCp1</i>  | - | reverse | 1568608 | ICWHOIW               |
| <i>yddBp6</i>  | - | reverse | 1575690 | ICWHOIW               |
| <i>yneEp5</i>  | - | reverse | 1607206 | ICWHOIW               |
| <i>yneFp7</i>  | - | reverse | 1609898 | ICWHOIW               |
| <i>sadp5</i>   | - | reverse | 1612823 | ICWHOIW               |
| <i>ydelp1</i>  | - | reverse | 1622540 | ICWHOIW               |
| <i>ydfKp5</i>  | - | forward | 1631009 | ICWHOIW               |
| <i>pinQp1</i>  | - | forward | 1631608 | ICWHOIW               |
| <i>ynfOp1</i>  | - | forward | 1634751 | ICWHOIW               |
| <i>remp1</i>   | - | reverse | 1642996 | ICWHOIW               |
| <i>ynfAp7</i>  | - | reverse | 1653703 | ICWHOIW               |
| <i>ynfDp6</i>  | - | forward | 1655438 | ICWHOIW               |
| <i>ydhlp</i>   | - | forward | 1719022 | AIPPIW, TIMIS         |
| <i>ydhFp1</i>  | - | reverse | 1723672 | ICWHOIW               |
| <i>lhrp</i>    | - | forward | 1726377 | AIPPIW, TIMIS         |
| <i>mdtKp10</i> | - | forward | 1741293 | ICWHOIW               |
| <i>ydhSp3</i>  | - | forward | 1745092 | ICWHOIW               |
| <i>ydhSp6</i>  | - | forward | 1745106 | ICWHOIW               |
| <i>ydhSp5</i>  | - | forward | 1745137 | ICWHOIW               |
| <i>ydhTp1</i>  | - | reverse | 1747593 | ICWHOIW               |
| <i>ydiMp5</i>  | - | forward | 1768950 | ICWHOIW               |
| <i>ydiMp1</i>  | - | forward | 1768954 | ICWHOIW               |
| <i>ppsRp1</i>  | - | forward | 1785363 | ICWHOIW               |
| <i>ydiVp</i>   | - | reverse | 1790111 | AIPPIW                |
| <i>nlpCp3</i>  | - | reverse | 1790851 | ICWHOIW               |
| <i>ydiYp6</i>  | - | reverse | 1804241 | ICWHOIW               |
| <i>chbGp4</i>  | - | reverse | 1815266 | ICWHOIW               |
| <i>astEp3</i>  | - | reverse | 1825093 | ICWHOIW               |
| <i>ydjXp1</i>  | - | forward | 1831332 | ICWHOIW               |
| <i>nudGp3</i>  | - | forward | 1839462 | ICWHOIW               |
| <i>ynjlp1</i>  | - | reverse | 1843035 | ICWHOIW               |
| <i>ydjFp1</i>  | - | reverse | 1852948 | ICWHOIW               |
| <i>yealp6</i>  | - | forward | 1868267 | ICWHOIW               |
| <i>yeaNp4</i>  | - | forward | 1873487 | ICWHOIW               |
| <i>yeaMp1</i>  | - | reverse | 1873672 | ICWHOIW               |
| <i>yeaOp4</i>  | - | forward | 1874801 | ICWHOIW               |
| <i>yeaQp1</i>  | - | reverse | 1877414 | ICWHOIW               |
| <i>yeaYp</i>   | - | reverse | 1888585 | AIPPIW, HIPPIW, TIMIS |
| <i>yoaCp1</i>  | - | forward | 1891990 | ICWHOIW               |
| <i>yoaHp1</i>  | - | reverse | 1892957 | ICWHOIW               |
| <i>kdgRp8</i>  | - | reverse | 1908149 | ICWHOIW               |

|                |   |         |         |                        |
|----------------|---|---------|---------|------------------------|
| <i>kdgRp1</i>  | - | reverse | 1908277 | ICWHOIW                |
| <i>yebVp1</i>  | - | forward | 1919769 | ICWHOIW                |
| <i>yebVp5</i>  | - | forward | 1919777 | ICWHOIW                |
| <i>yebWp3</i>  | - | forward | 1919981 | ICWHOIW                |
| <i>yebAp1</i>  | - | reverse | 1939707 | ICWHOIW                |
| <i>yebAp6</i>  | - | reverse | 1939745 | ICWHOIW                |
| <i>yebAp5</i>  | - | reverse | 1939857 | ICWHOIW                |
| <i>yecDp4</i>  | - | forward | 1948802 | ICWHOIW                |
| <i>micLp</i>   | - | reverse | 1956771 | TIMIS                  |
| <i>yedJp3</i>  | - | reverse | 2031227 | ICWHOIW                |
| <i>yodBp16</i> | - | forward | 2040318 | ICWHOIW                |
| <i>mtfAp1</i>  | - | forward | 2041642 | ICWHOIW                |
| <i>yeeOp1</i>  | - | reverse | 2057852 | ICWHOIW                |
| <i>yeeOp6</i>  | - | reverse | 2057899 | ICWHOIW                |
| <i>yeeAp6</i>  | - | reverse | 2078685 | ICWHOIW                |
| <i>yeeFp2</i>  | - | reverse | 2085262 | ICWHOIW                |
| <i>yeeZp7</i>  | - | reverse | 2087200 | ICWHOIW                |
| <i>wbbKp4</i>  | - | reverse | 2102630 | ICWHOIW                |
| <i>wcaMp1</i>  | - | reverse | 2113958 | ICWHOIW                |
| <i>wzap2</i>   | - | reverse | 2135217 | AIPPIW, TIMIS          |
| <i>cyaRp</i>   | - | forward | 2165138 | AIPPIW, HTTIMIS, TIMIS |
| <i>yegXp1</i>  | - | reverse | 2181823 | ICWHOIW                |
| <i>yegXp6</i>  | - | reverse | 2181842 | ICWHOIW                |
| <i>thiDp3</i>  | - | reverse | 2182695 | ICWHOIW                |
| <i>rcnBp</i>   | - | forward | 2184906 | ICWHOIW                |
| <i>yehEp8</i>  | - | reverse | 2190923 | ICWHOIW                |
| <i>yehEp1</i>  | - | reverse | 2190931 | ICWHOIW                |
| <i>mrpp2</i>   | - | reverse | 2192197 | ICWHOIW                |
| <i>mrpp7</i>   | - | reverse | 2192202 | ICWHOIW                |
| <i>yohCp4</i>  | - | reverse | 2223691 | ICWHOIW                |
| <i>yohCp3</i>  | - | reverse | 2223701 | ICWHOIW                |
| <i>yohDp2</i>  | - | forward | 2223785 | ICWHOIW                |
| <i>mglCp9</i>  | - | reverse | 2235945 | ICWHOIW                |
| <i>mglCp6</i>  | - | reverse | 2235981 | ICWHOIW                |
| <i>psuTp2</i>  | - | reverse | 2255518 | ICWHOIW                |
| <i>psuGp4</i>  | - | reverse | 2256579 | ICWHOIW                |
| <i>yeiWp7</i>  | - | reverse | 2263435 | ICWHOIW                |
| <i>yejKp5</i>  | - | reverse | 2282131 | ICWHOIW                |
| <i>ccmHp1</i>  | - | reverse | 2290643 | ICWHOIW                |
| <i>mqop1</i>   | - | reverse | 2304946 | ICWHOIW                |
| <i>apbEp1</i>  | - | reverse | 2309616 | ICWHOIW                |

|               |   |         |         |               |
|---------------|---|---------|---------|---------------|
| <i>rcsCp4</i> | - | reverse | 2318103 | ICWHOIW       |
| <i>yfaPp4</i> | - | reverse | 2326221 | ICWHOIW       |
| <i>yfaLp1</i> | - | reverse | 2342240 | ICWHOIW       |
| <i>yfaLp3</i> | - | reverse | 2342287 | ICWHOIW       |
| <i>elaAp4</i> | - | reverse | 2379708 | ICWHOIW       |
| <i>yfbLp7</i> | - | forward | 2383850 | ICWHOIW       |
| <i>yfbKp7</i> | - | reverse | 2383927 | ICWHOIW       |
| <i>yfbNp1</i> | - | reverse | 2386609 | ICWHOIW       |
| <i>yfclp8</i> | - | reverse | 2421636 | ICWHOIW       |
| <i>yfclp7</i> | - | reverse | 2421734 | ICWHOIW       |
| <i>yfcVp8</i> | - | reverse | 2453710 | ICWHOIW       |
| <i>yfdGp4</i> | - | forward | 2465759 | ICWHOIW       |
| <i>emrYp1</i> | - | reverse | 2480356 | ICWHOIW       |
| <i>ypdlp1</i> | - | forward | 2492516 | ICWHOIW       |
| <i>alaXp2</i> | - | reverse | 2516301 | ICWHOIW       |
| <i>yfeCp4</i> | - | forward | 2516397 | ICWHOIW       |
| <i>yfeHp5</i> | - | forward | 2524931 | ICWHOIW       |
| <i>yfeRp1</i> | - | reverse | 2525061 | ICWHOIW       |
| <i>cysZp1</i> | - | forward | 2529405 | ICWHOIW       |
| <i>yfeYp</i>  | - | reverse | 2549265 | AIPPIW, TIMIS |
| <i>intZp3</i> | - | forward | 2556715 | ICWHOIW       |
| <i>yffOp1</i> | - | forward | 2560102 | ICWHOIW       |
| <i>yffQp1</i> | - | forward | 2561411 | ICWHOIW       |
| <i>yffQp3</i> | - | forward | 2561431 | ICWHOIW       |
| <i>ypfMp2</i> | - | reverse | 2589092 | ICWHOIW       |
| <i>bamCp</i>  | - | reverse | 2597036 | HIPPIW, TIMIS |
| <i>bepAp1</i> | - | forward | 2614090 | AIPPIW, TIMIS |
| <i>ispGp1</i> | - | reverse | 2639902 | ICWHOIW       |
| <i>ispGp4</i> | - | reverse | 2639972 | ICWHOIW       |
| <i>ispGp5</i> | - | reverse | 2639976 | ICWHOIW       |
| <i>iscAp7</i> | - | reverse | 2657975 | ICWHOIW       |
| <i>iscAp6</i> | - | reverse | 2657984 | ICWHOIW       |
| <i>yfhRp2</i> | - | forward | 2662266 | ICWHOIW       |
| <i>hcaTp1</i> | - | reverse | 2665885 | ICWHOIW       |
| <i>acpSp2</i> | - | reverse | 2699159 | ICWHOIW       |
| <i>acpSp3</i> | - | reverse | 2699184 | ICWHOIW       |
| <i>lepBp1</i> | - | reverse | 2703486 | ICWHOIW       |
| <i>rseAp3</i> | - | reverse | 2707654 | AIPPIW, TIMIS |
| <i>bamDp2</i> | - | forward | 2733983 | AIPPIW, TIMIS |
| <i>bamDp</i>  | - | forward | 2734028 | HIPPIW, TIMIS |
| <i>rplSp1</i> | - | reverse | 2742664 | ICWHOIW       |

|                |   |         |         |               |
|----------------|---|---------|---------|---------------|
| <i>bamEp</i>   | - | forward | 2751508 | AIPPIW, TIMIS |
| <i>yfjlp8</i>  | - | forward | 2756903 | ICWHOIW       |
| <i>rnlBp</i>   | - | forward | 2764729 | AIPPIW, TIMIS |
| <i>csiRp3</i>  | - | forward | 2793493 | ICWHOIW       |
| <i>alaEp1</i>  | - | forward | 2797092 | ICWHOIW       |
| <i>ygbNp2</i>  | - | forward | 2862929 | ICWHOIW       |
| <i>ygcNp3</i>  | - | forward | 2890594 | ICWHOIW       |
| <i>ygcUp5</i>  | - | reverse | 2897629 | ICWHOIW       |
| <i>ygcGp7</i>  | - | forward | 2903627 | ICWHOIW       |
| <i>mazGp4</i>  | - | reverse | 2908882 | ICWHOIW       |
| <i>gudDp1</i>  | - | reverse | 2917535 | ICWHOIW       |
| <i>thyAp2</i>  | - | reverse | 2963370 | ICWHOIW       |
| <i>mutHp5</i>  | - | forward | 2967604 | ICWHOIW       |
| <i>ygeAp5</i>  | - | reverse | 2978825 | ICWHOIW       |
| <i>yqeFp1</i>  | - | reverse | 2983646 | ICWHOIW       |
| <i>yqeFp8</i>  | - | reverse | 2983723 | ICWHOIW       |
| <i>yqeGp1</i>  | - | forward | 2983741 | ICWHOIW       |
| <i>yqeFp11</i> | - | reverse | 2983831 | ICWHOIW       |
| <i>yqelp1</i>  | - | forward | 2986366 | ICWHOIW       |
| <i>yqeKp12</i> | - | reverse | 2988592 | ICWHOIW       |
| <i>hyuAp6</i>  | - | forward | 3007852 | ICWHOIW       |
| <i>hyuAp1</i>  | - | forward | 3007941 | ICWHOIW       |
| <i>ygfSp5</i>  | - | reverse | 3027186 | ICWHOIW       |
| <i>ygfUp6</i>  | - | forward | 3029211 | ICWHOIW       |
| <i>yqfAp10</i> | - | reverse | 3041386 | ICWHOIW       |
| <i>yggCp1</i>  | - | reverse | 3072778 | ICWHOIW       |
| <i>yqgBp1</i>  | - | reverse | 3084272 | ICWHOIW       |
| <i>ygglp6</i>  | - | forward | 3087610 | ICWHOIW       |
| <i>rsmEp1</i>  | - | forward | 3089040 | ICWHOIW       |
| <i>yggNp2</i>  | - | reverse | 3099766 | HIPPIW, TIMIS |
| <i>yggNp1</i>  | - | reverse | 3099820 | HIPPIW, TIMIS |
| <i>yqgAp4</i>  | - | forward | 3107543 | ICWHOIW       |
| <i>yqgAp1</i>  | - | forward | 3107556 | ICWHOIW       |
| <i>yghDp3</i>  | - | reverse | 3109298 | ICWHOIW       |
| <i>pppAp3</i>  | - | reverse | 3112501 | ICWHOIW       |
| <i>yghQp1</i>  | - | reverse | 3130615 | ICWHOIW       |
| <i>yghTp14</i> | - | forward | 3131937 | ICWHOIW       |
| <i>gprp1</i>   | - | forward | 3145803 | ICWHOIW       |
| <i>yqhCp1</i>  | - | reverse | 3153406 | ICWHOIW       |
| <i>ygiQp1</i>  | - | reverse | 3159332 | ICWHOIW       |
| <i>ftsPp1</i>  | - | reverse | 3160873 | ICWHOIW       |



|                |   |         |         |                      |
|----------------|---|---------|---------|----------------------|
| <i>mdaBp1</i>  | - | forward | 3170445 | ICWHOIW              |
| <i>ygiDp3</i>  | - | forward | 3180451 | ICWHOIW              |
| <i>ygiDp2</i>  | - | reverse | 3180583 | ICWHOIW              |
| <i>yqiCp1</i>  | - | forward | 3182853 | ICWHOIW              |
| <i>glnEp7</i>  | - | reverse | 3197716 | ICWHOIW              |
| <i>glnEp1</i>  | - | reverse | 3197720 | ICWHOIW              |
| <i>ygiMp2</i>  | - | forward | 3199064 | AIPPIW, TIMIS        |
| <i>ygiMp</i>   | - | forward | 3199126 | HIPPIW, TIMIS        |
| <i>bacAp</i>   | - | reverse | 3202197 | AIPPIW, TIMIS        |
| <i>plsYp5</i>  | - | forward | 3202555 | ICWHOIW              |
| <i>rpoDp4</i>  | - | forward | 3210715 | AIPPIW, TIMIS        |
| <i>ygjIp2</i>  | - | forward | 3224092 | ICWHOIW              |
| <i>ygjIp1</i>  | - | forward | 3224164 | ICWHOIW              |
| <i>higAp8</i>  | - | reverse | 3232363 | ICWHOIW              |
| <i>rlmGp4</i>  | - | reverse | 3233914 | ICWHOIW              |
| <i>ygjQp4</i>  | - | forward | 3234387 | ICWHOIW              |
| <i>yqjAp2</i>  | - | forward | 3245665 | HIPPIW, TIMIS        |
| <i>yhaHp7</i>  | - | forward | 3250271 | ICWHOIW              |
| <i>yhalp9</i>  | - | forward | 3250722 | ICWHOIW              |
| <i>yhalp12</i> | - | forward | 3250847 | ICWHOIW              |
| <i>yhaKp5</i>  | - | forward | 3252291 | ICWHOIW              |
| <i>yhaKp4</i>  | - | forward | 3252296 | ICWHOIW              |
| <i>tdcRp8</i>  | - | forward | 3265276 | ICWHOIW              |
| <i>yraHp4</i>  | - | forward | 3285387 | ICWHOIW              |
| <i>yraPp2</i>  | - | forward | 3294094 | AIPPIW, TIMIS        |
| <i>yraPp</i>   | - | forward | 3294371 | HIPPIW, TIMIS        |
| <i>yraRp1</i>  | - | reverse | 3297034 | ICWHOIW              |
| <i>yhbUp7</i>  | - | forward | 3299301 | ICWHOIW              |
| <i>yhbUp1</i>  | - | forward | 3299351 | ICWHOIW              |
| <i>deaDp1</i>  | - | reverse | 3305931 | ICWHOIW              |
| <i>ftsHp1</i>  | - | reverse | 3325124 | ICWHOIW              |
| <i>greAp2</i>  | - | reverse | 3326875 | AIPPIW, TIMIS        |
| <i>ibaGp2</i>  | - | reverse | 3334908 | HIPPIW, ICWHOIW      |
| <i>lptAp1</i>  | - | forward | 3341348 | HIPPIW, IDAIS, TIMIS |
| <i>lptBp</i>   | - | forward | 3341418 | AIPPIW, TIMIS        |
| <i>yhcAp1</i>  | - | forward | 3360061 | ICWHOIW              |
| <i>yhcFp1</i>  | - | forward | 3364742 | ICWHOIW              |
| <i>yhcMp1</i>  | - | reverse | 3378178 | ICWHOIW              |
| <i>aaeBp8</i>  | - | reverse | 3386280 | ICWHOIW              |
| <i>aaeBp3</i>  | - | reverse | 3386285 | ICWHOIW              |
| <i>yhdHp1</i>  | - | forward | 3401302 | ICWHOIW              |

|                |   |         |         |                        |
|----------------|---|---------|---------|------------------------|
| <i>yhdUp1</i>  | - | forward | 3410519 | ICWHOIW                |
| <i>envRp11</i> | - | reverse | 3411509 | ICWHOIW                |
| <i>envRp13</i> | - | reverse | 3411623 | ICWHOIW                |
| <i>gspAp4</i>  | - | reverse | 3453656 | AIPPIW, TIMIS          |
| <i>fusAp</i>   | - | reverse | 3471707 | AIPPIW, TIMIS          |
| <i>fkpAp1</i>  | - | reverse | 3475547 | AIPPIW, IHBCEIW, TIMIS |
| <i>yhfYp1</i>  | - | reverse | 3509639 | ICWHOIW                |
| <i>yhfYp3</i>  | - | reverse | 3509644 | ICWHOIW                |
| <i>nudEp1</i>  | - | reverse | 3524208 | ICWHOIW                |
| <i>yrfFp6</i>  | - | forward | 3524296 | ICWHOIW                |
| <i>yhgFp2</i>  | - | forward | 3535198 | ICWHOIW                |
| <i>malQp</i>   | - | reverse | 3548421 | AIPPIW, TIMIS          |
| <i>rtcAp1</i>  | - | reverse | 3554902 | ICWHOIW                |
| <i>rtcAp2</i>  | - | reverse | 3555024 | ICWHOIW                |
| <i>glgXp3</i>  | - | reverse | 3569442 | ICWHOIW                |
| <i>ugpQp1</i>  | - | reverse | 3586323 | ICWHOIW                |
| <i>panZp1</i>  | - | forward | 3595851 | ICWHOIW                |
| <i>ftsXp3</i>  | - | reverse | 3600275 | ICWHOIW                |
| <i>ftsXp4</i>  | - | reverse | 3600279 | ICWHOIW                |
| <i>rsmDp1</i>  | - | forward | 3602375 | ICWHOIW                |
| <i>dcrBp1</i>  | - | forward | 3607790 | ICWHOIW                |
| <i>dcrBp2</i>  | - | forward | 3607803 | ICWHOIW                |
| <i>rhsBp9</i>  | - | forward | 3617067 | ICWHOIW                |
| <i>rhsBp3</i>  | - | forward | 3617097 | ICWHOIW                |
| <i>rhsBp12</i> | - | forward | 3617120 | ICWHOIW                |
| <i>yhiMp11</i> | - | forward | 3632840 | ICWHOIW                |
| <i>yhjRp12</i> | - | reverse | 3694238 | ICWHOIW                |
| <i>yhjRp10</i> | - | reverse | 3694306 | ICWHOIW                |
| <i>yhjRp5</i>  | - | reverse | 3694379 | ICWHOIW                |
| <i>yhjRp13</i> | - | reverse | 3694398 | ICWHOIW                |
| <i>yhjXp6</i>  | - | reverse | 3710120 | ICWHOIW                |
| <i>bisCp4</i>  | - | reverse | 3714438 | ICWHOIW                |
| <i>insJp4</i>  | - | forward | 3718617 | ICWHOIW                |
| <i>hokAp6</i>  | - | reverse | 3718833 | ICWHOIW                |
| <i>insKp</i>   | - | forward | 3719088 | HIPPIW                 |
| <i>ysaBp1</i>  | - | reverse | 3723925 | ICWHOIW                |
| <i>yiaBp1</i>  | - | reverse | 3725820 | ICWHOIW                |
| <i>yiaKp2</i>  | - | forward | 3740743 | AIPPIW, TIMIS          |
| <i>gpsAp8</i>  | - | reverse | 3781704 | ICWHOIW                |
| <i>yibBp6</i>  | - | reverse | 3791857 | ICWHOIW                |
| <i>waaUp9</i>  | - | reverse | 3797421 | ICWHOIW                |

|                |   |         |         |               |
|----------------|---|---------|---------|---------------|
| <i>yicJp</i>   | - | reverse | 3834687 | AIPPIW, TIMIS |
| <i>yicNp4</i>  | - | reverse | 3840532 | ICWHOIW       |
| <i>yicOp11</i> | - | reverse | 3841842 | ICWHOIW       |
| <i>yicOp5</i>  | - | reverse | 3841903 | ICWHOIW       |
| <i>yicOp1</i>  | - | reverse | 3841980 | ICWHOIW       |
| <i>yidQp</i>   | - | forward | 3865567 | HIPPIW, TIMIS |
| <i>yieHp4</i>  | - | forward | 3894680 | ICWHOIW       |
| <i>yieKp2</i>  | - | reverse | 3897487 | ICWHOIW       |
| <i>recQp1</i>  | - | forward | 4003881 | ICWHOIW       |
| <i>yihFp4</i>  | - | forward | 4042078 | ICWHOIW       |
| <i>yihFp1</i>  | - | forward | 4042198 | ICWHOIW       |
| <i>yihLp2</i>  | - | forward | 4058276 | ICWHOIW       |
| <i>yihNp5</i>  | - | forward | 4060189 | ICWHOIW       |
| <i>yihQp1</i>  | - | reverse | 4067469 | ICWHOIW       |
| <i>cpxAp1</i>  | - | reverse | 4103124 | ICWHOIW       |
| <i>yiiSp</i>   | - | forward | 4110892 | AIPPIW, TIMIS |
| <i>yijEp5</i>  | - | forward | 4134112 | ICWHOIW       |
| <i>arpAp1</i>  | - | reverse | 4220652 | ICWHOIW       |
| <i>rluFp1</i>  | - | forward | 4228332 | ICWHOIW       |
| <i>xylEp8</i>  | - | reverse | 4240283 | ICWHOIW       |
| <i>xylEp1</i>  | - | reverse | 4240293 | ICWHOIW       |
| <i>plsBp</i>   | - | reverse | 4254621 | AIPPIW, TIMIS |
| <i>gltPp8</i>  | - | forward | 4292291 | ICWHOIW       |
| <i>gltPp1</i>  | - | forward | 4292401 | ICWHOIW       |
| <i>mdtPp6</i>  | - | reverse | 4299259 | ICWHOIW       |
| <i>frdDp2</i>  | - | reverse | 4377456 | ICWHOIW       |
| <i>frdDp1</i>  | - | reverse | 4377496 | ICWHOIW       |
| <i>psdp</i>    | - | reverse | 4388661 | AIPPIW, TIMIS |
| <i>yjfPp5</i>  | - | forward | 4414958 | ICWHOIW       |
| <i>ytfHp6</i>  | - | forward | 4432127 | ICWHOIW       |
| <i>ytfJp</i>   | - | reverse | 4437309 | HIPPIW, TIMIS |
| <i>tamAp1</i>  | - | forward | 4440293 | ICWHOIW       |
| <i>ytfQp6</i>  | - | forward | 4447840 | ICWHOIW       |
| <i>yjgZp1</i>  | - | forward | 4499081 | ICWHOIW       |
| <i>yjhBp7</i>  | - | forward | 4501905 | ICWHOIW       |
| <i>nanSp1</i>  | - | reverse | 4535726 | ICWHOIW       |
| <i>yjiJp4</i>  | - | reverse | 4560705 | ICWHOIW       |
| <i>yjiKp7</i>  | - | reverse | 4561753 | ICWHOIW       |
| <i>yjiKp9</i>  | - | reverse | 4561757 | ICWHOIW       |
| <i>hsdSp1</i>  | - | reverse | 4579525 | ICWHOIW       |
| <i>yjiAp7</i>  | - | reverse | 4587071 | ICWHOIW       |

|               |   |         |         |         |
|---------------|---|---------|---------|---------|
| <i>yjiYp3</i> | - | reverse | 4589370 | ICWHOIW |
| <i>yjjLp7</i> | - | reverse | 4592860 | ICWHOIW |
| <i>yjjLp6</i> | - | reverse | 4592867 | ICWHOIW |
| <i>yjjLp8</i> | - | reverse | 4592905 | ICWHOIW |
| <i>yjjAp1</i> | - | reverse | 4598360 | ICWHOIW |

**[B] Promoters identified as the constitutive promoters by SELEX**

|                |      |         |         |                       |
|----------------|------|---------|---------|-----------------------|
| <i>rybBp</i>   | 55.5 | reverse | 887280  | HIPPIW, IDAIS, TIMIS  |
| <i>micAp</i>   | 40.9 | forward | 2812824 | HIPPIW, TIMIS         |
| <i>rpoHp3</i>  | 37.4 | reverse | 3598893 | AIPPIW, HIPPIW, TIMIS |
| <i>yahMp5</i>  | 17.8 | forward | 344560  | ICWHOIW               |
| <i>yniDp6</i>  | 10.1 | forward | 1803125 | ICWHOIW               |
| <i>yfeKp</i>   | 7.5  | forward | 2535337 | AIPPIW, TIMIS         |
| <i>cspFp8</i>  | 7.3  | forward | 1639870 | ICWHOIW               |
| <i>yrhBp9</i>  | 6.5  | forward | 3582743 | ICWHOIW               |
| <i>ymgFp1</i>  | 5.4  | forward | 1218037 | ICWHOIW               |
| <i>oxcp10</i>  | 4.9  | reverse | 2490152 | ICWHOIW               |
| <i>oxcp11</i>  | 4.9  | reverse | 2490166 | ICWHOIW               |
| <i>cspHp14</i> | 4.7  | reverse | 1050527 | ICWHOIW               |
| <i>cspHp15</i> | 4.7  | reverse | 1050530 | ICWHOIW               |
| <i>cspHp13</i> | 4.7  | reverse | 1050596 | ICWHOIW               |
| <i>yjtDp8</i>  | 4.6  | forward | 4638861 | ICWHOIW               |
| <i>ygeWp1</i>  | 4.5  | forward | 3004246 | ICWHOIW               |
| <i>ydjEp5</i>  | 4.4  | reverse | 1852007 | ICWHOIW               |
| <i>iapp6</i>   | 4.2  | forward | 2874566 | ICWHOIW               |
| <i>ykgCp1</i>  | 4.0  | reverse | 319439  | ICWHOIW               |
| <i>ybgSp1</i>  | 3.9  | reverse | 784562  | ICWHOIW               |
| <i>yjjMp4</i>  | 3.9  | reverse | 4593970 | ICWHOIW               |
| <i>dsbCp</i>   | 3.7  | reverse | 3036856 | HIPPIW, TIMIS         |
| <i>dsbCp2</i>  | 3.7  | reverse | 3037655 | ICWHOIW               |
| <i>yniAp7</i>  | 3.6  | forward | 1805603 | ICWHOIW               |
| <i>yniAp1</i>  | 3.6  | forward | 1805743 | ICWHOIW               |
| <i>yibGp6</i>  | 3.6  | forward | 3766087 | ICWHOIW               |
| <i>ydhBp2</i>  | 3.5  | reverse | 1737833 | ICWHOIW               |
| <i>ydhCp1</i>  | 3.5  | forward | 1737879 | ICWHOIW               |
| <i>yghFp</i>   | 3.4  | reverse | 3110921 | HIPPIW, TIMIS         |
| <i>yhcOp1</i>  | 3.4  | reverse | 3384232 | ICWHOIW               |
| <i>setCp14</i> | 3.4  | forward | 3834767 | ICWHOIW               |
| <i>yacHp3</i>  | 3.3  | reverse | 131307  | ICWHOIW               |
| <i>yfbPp7</i>  | 3.3  | forward | 2387017 | ICWHOIW               |

|                |     |         |         |                       |
|----------------|-----|---------|---------|-----------------------|
| <i>xanPp5</i>  | 3.3 | forward | 3826844 | ICWHOIW               |
| <i>lpxPp</i>   | 3.3 | forward | 2493600 | AIPPIW, HIPPIW, TIMIS |
| <i>ydhZp6</i>  | 3.2 | reverse | 1753233 | ICWHOIW               |
| <i>yfjPp5</i>  | 3.2 | forward | 2765664 | ICWHOIW               |
| <i>cldp9</i>   | 3.0 | reverse | 2096334 | ICWHOIW               |
| <i>yjhGp4</i>  | 3.0 | reverse | 4522249 | ICWHOIW               |
| <i>yieEp</i>   | 3.0 | forward | 3891852 | AIPPIW, TIMIS         |
| <i>cybBp5</i>  | 2.8 | forward | 1488785 | ICWHOIW               |
| <i>cybBp7</i>  | 2.8 | forward | 1488790 | ICWHOIW               |
| <i>yejGp5</i>  | 2.8 | reverse | 2276375 | ICWHOIW               |
| <i>yejGp8</i>  | 2.8 | reverse | 2276468 | ICWHOIW               |
| <i>yfbOp1</i>  | 2.7 | forward | 2386595 | ICWHOIW               |
| <i>mppAp5</i>  | 2.7 | forward | 1391078 | ICWHOIW               |
| <i>eptBp</i>   | 2.6 | reverse | 3708604 | TIMIS                 |
| <i>ygcWp11</i> | 2.6 | reverse | 2898431 | ICWHOIW               |
| <i>ygcWp12</i> | 2.6 | reverse | 2898493 | ICWHOIW               |
| <i>yaeQp3</i>  | 2.6 | forward | 214088  | ICWHOIW               |
| <i>ygeRp1</i>  | 2.5 | reverse | 2998061 | ICWHOIW               |
| <i>ycaDp1</i>  | 2.5 | forward | 944942  | ICWHOIW               |
| <i>ydeRp1</i>  | 2.5 | reverse | 1586322 | ICWHOIW               |
| <i>bamBp</i>   | 2.5 | reverse | 2636997 | AIPPIW, TIMIS         |
| <i>ulaRp5</i>  | 2.5 | reverse | 4416585 | ICWHOIW               |
| <i>etkp1</i>   | 2.4 | reverse | 1043526 | ICWHOIW               |
| <i>yfgGp7</i>  | 2.3 | forward | 2627107 | ICWHOIW               |
| <i>yjcEp8</i>  | 2.3 | forward | 4277852 | ICWHOIW               |
| <i>yjcEp7</i>  | 2.3 | forward | 4277858 | ICWHOIW               |
| <i>ybdHp6</i>  | 2.2 | reverse | 632740  | ICWHOIW               |
| <i>ypjAp8</i>  | 2.2 | reverse | 2780844 | ICWHOIW               |
| <i>ftnBp</i>   | 2.1 | forward | 1984799 | AIPPIW, TIMIS         |
| <i>yddJp8</i>  | 2.1 | reverse | 1542782 | ICWHOIW               |
| <i>yddJp9</i>  | 2.1 | reverse | 1542787 | ICWHOIW               |
| <i>yddJp1</i>  | 2.1 | reverse | 1542890 | ICWHOIW               |
| <i>rfaDp4</i>  | 2.1 | forward | 3791993 | HIPPIW, TIMIS         |
| <i>yeilp2</i>  | 2.1 | forward | 2249675 | ICWHOIW               |
| <i>yhjJp</i>   | 2.1 | reverse | 3680039 | AIPPIW, TIMIS         |
